# Supplementary material
Source: publisher site journal article supplement (https://www.dovepress.com/get_supplementary_file.php?f=180971T.xlsx)
Supplement: Supplementary file 1 [file get_supplementary_file.php]

## Sheet: TargetScan7
miRNA	Position in the UTR	seed match	context++ score	context++ score percentile	weighted context++ score	conserved branch length	Pct
Conserved sites
No conserved sites found
Poorly conserved sites
hsa-miR-4650-3p	22-28	7mer-m8	-0.23	87	-0.23	0	N/A
hsa-miR-6831-5p	23-29	7mer-m8	-0.26	94	-0.26	0.607	N/A
hsa-miR-3927-3p	23-29	7mer-m8	-0.24	92	-0.24	0.607	N/A
hsa-miR-4736	26-32	7mer-m8	-0.33	98	-0.33	0	N/A
hsa-miR-6721-5p	27-34	8mer	-0.6	99	-0.6	0	N/A
hsa-miR-3147	30-36	7mer-m8	-0.34	97	-0.34	0	N/A
hsa-miR-4259	31-37	7mer-m8	-0.26	92	-0.26	0	N/A
hsa-miR-27b-3p	35-41	7mer-m8	-0.17	90	-0.17	1.837	N/A
hsa-miR-27a-3p	35-41	7mer-m8	-0.17	90	-0.17	1.837	N/A
hsa-miR-128-3p	35-41	7mer-1A	-0.15	88	-0.15	1.837	N/A
hsa-miR-3681-3p	35-41	7mer-1A	-0.14	84	-0.14	1.837	N/A
hsa-miR-216a-3p	35-41	7mer-1A	-0.13	84	-0.13	1.837	N/A
hsa-miR-5587-5p	38-45	8mer	-0.6	99	-0.6	0	N/A
hsa-miR-4259	42-48	7mer-1A	-0.26	92	-0.26	0	N/A
hsa-miR-4715-5p	42-48	7mer-1A	-0.25	92	-0.25	0.064	N/A
hsa-miR-4729	47-53	7mer-1A	-0.05	84	-0.05	0	N/A
hsa-miR-5696	47-53	7mer-m8	-0.05	78	-0.05	0	N/A
hsa-miR-616-3p	49-55	7mer-1A	-0.19	91	-0.19	0.01	N/A
hsa-miR-215-3p	50-57	8mer	-0.5	99	-0.5	0.064	N/A
hsa-miR-6773-3p	51-57	7mer-1A	-0.19	89	-0.19	0	N/A
hsa-miR-377-3p	58-64	7mer-m8	-0.2	88	-0.2	0.029	N/A
hsa-miR-342-3p	59-66	8mer	-0.5	99	-0.5	0.707	N/A
hsa-miR-1229-3p	61-67	7mer-1A	-0.14	84	-0.14	0	N/A
hsa-miR-4273	63-70	8mer	-0.34	99	-0.34	0	N/A
hsa-miR-7156-5p	63-70	8mer	-0.43	99	-0.43	0	N/A
hsa-miR-2117	63-69	7mer-1A	-0.15	81	-0.15	0	N/A
hsa-miR-4677-5p	64-70	7mer-1A	-0.14	89	-0.14	0.064	N/A
hsa-miR-6739-3p	64-70	7mer-m8	-0.15	85	-0.15	0	N/A
hsa-miR-578	67-73	7mer-m8	-0.14	91	-0.14	0.064	N/A
hsa-miR-5584-3p	69-75	7mer-m8	-0.14	90	-0.14	0	N/A
hsa-miR-4277	70-77	8mer	-0.36	99	-0.36	0	N/A
hsa-miR-584-3p	71-77	7mer-1A	-0.12	81	-0.12	0	N/A
hsa-miR-642a-5p	76-82	7mer-1A	-0.19	93	-0.19	0.07	N/A
hsa-miR-4446-5p	77-83	7mer-m8	-0.15	90	-0.15	0	N/A
hsa-miR-5006-3p	77-83	7mer-1A	-0.11	85	-0.11	0	N/A
hsa-miR-4755-5p	77-83	7mer-1A	-0.11	85	-0.11	0	N/A
hsa-miR-3160-5p	80-86	7mer-1A	-0.1	84	-0.1	0	N/A
hsa-miR-18b-5p	84-90	7mer-m8	-0.22	92	-0.22	0.743	< 0.1
hsa-miR-18a-5p	84-90	7mer-m8	-0.21	91	-0.21	0.743	< 0.1
hsa-miR-4735-3p	84-90	7mer-m8	-0.19	89	-0.19	0.743	< 0.1
hsa-miR-4747-5p	87-93	7mer-m8	-0.24	92	-0.24	0	N/A
hsa-miR-5196-5p	87-93	7mer-m8	-0.19	85	-0.19	0	N/A
hsa-miR-4725-3p	88-94	7mer-m8	-0.23	88	-0.23	0	N/A
hsa-miR-6780b-5p	88-94	7mer-m8	-0.23	88	-0.23	0	N/A
hsa-miR-4271	88-94	7mer-m8	-0.15	84	-0.15	0	N/A
hsa-miR-625-5p	89-96	8mer	-0.45	97	-0.45	0	N/A
hsa-miR-6782-5p	89-100	non-canonical	N/A	N/A	N/A	0	N/A
hsa-miR-6782-5p	89-100	non-canonical	N/A	N/A	N/A	0	N/A
hsa-miR-4525	90-96	7mer-1A	-0.24	94	-0.24	0	N/A
hsa-miR-1275	90-96	7mer-m8	-0.23	92	-0.23	0.01	N/A
hsa-miR-4665-5p	90-96	7mer-m8	-0.28	91	-0.28	0.01	N/A
hsa-miR-5010-5p	90-96	7mer-1A	-0.26	91	-0.26	0	N/A
hsa-miR-5698	90-96	7mer-1A	-0.24	77	-0.24	0	N/A
hsa-miR-6870-5p	90-96	7mer-1A	-0.21	72	-0.21	0	N/A
hsa-miR-7111-5p	90-96	7mer-1A	-0.21	71	-0.21	0	N/A
hsa-miR-4723-5p	90-96	7mer-1A	-0.21	71	-0.21	0	N/A
hsa-miR-4472	91-97	7mer-m8	-0.26	94	-0.26	0	N/A
hsa-miR-4447	91-97	7mer-m8	-0.26	94	-0.26	0	N/A
hsa-miR-92a-2-5p	92-98	7mer-m8	-0.22	91	-0.22	0	N/A
hsa-miR-4463	92-103	non-canonical	N/A	N/A	N/A	0	N/A
hsa-miR-4463	92-103	non-canonical	N/A	N/A	N/A	0	N/A
hsa-miR-6756-5p	93-99	7mer-m8	-0.28	89	-0.28	0	N/A
hsa-miR-6766-5p	93-99	7mer-m8	-0.24	84	-0.24	0	N/A
hsa-miR-4651	94-101	8mer	-0.51	98	-0.51	0	N/A
hsa-miR-608	94-101	8mer	-0.5	97	-0.5	0	N/A
hsa-miR-6812-5p	95-101	7mer-m8	-0.26	90	-0.26	0	N/A
hsa-miR-6819-5p	95-101	7mer-m8	-0.23	88	-0.23	0	N/A
hsa-miR-6737-5p	95-101	7mer-m8	-0.22	87	-0.22	0	N/A
hsa-miR-6747-5p	95-101	7mer-1A	-0.19	86	-0.19	0	N/A
hsa-miR-342-5p	95-101	7mer-1A	-0.16	82	-0.16	0	N/A
hsa-miR-4664-5p	95-101	7mer-1A	-0.1	76	-0.1	0	N/A
hsa-miR-7155-5p	96-103	8mer	-0.43	99	-0.43	0	N/A
hsa-miR-4667-5p	97-103	7mer-1A	-0.31	97	-0.31	0.01	N/A
hsa-miR-8089	97-103	7mer-1A	-0.3	96	-0.3	0.01	N/A
hsa-miR-4700-5p	97-103	7mer-1A	-0.24	93	-0.24	0.01	N/A
hsa-miR-637	97-103	7mer-1A	-0.23	91	-0.23	0.01	N/A
hsa-miR-424-3p	103-109	7mer-m8	-0.19	91	-0.19	0	N/A
hsa-miR-548z	105-111	7mer-1A	-0.01	57	-0.01	0.064	N/A
hsa-miR-548ac	105-111	7mer-1A	-0.01	57	-0.01	0.064	N/A
hsa-miR-548bb-3p	105-111	7mer-1A	-0.01	57	-0.01	0.064	N/A
hsa-miR-548d-3p	105-111	7mer-1A	-0.01	57	-0.01	0.064	N/A
hsa-miR-548h-3p	105-111	7mer-1A	-0.01	57	-0.01	0.064	N/A
hsa-miR-548j-3p	105-111	7mer-1A	-0.01	50	-0.01	0.064	N/A
hsa-miR-548ae-3p	105-111	7mer-1A	-0.01	50	-0.01	0.064	N/A
hsa-miR-548aq-3p	105-111	7mer-1A	-0.01	50	-0.01	0.064	N/A
hsa-miR-548am-3p	105-111	7mer-1A	-0.01	50	-0.01	0.064	N/A
hsa-miR-548ah-3p	105-111	7mer-1A	-0.01	50	-0.01	0.064	N/A
hsa-miR-548x-3p	105-111	7mer-1A	-0.01	49	-0.01	0.064	N/A
hsa-miR-548aj-3p	105-111	7mer-1A	-0.01	49	-0.01	0.064	N/A
hsa-miR-577	108-114	7mer-m8	-0.1	88	-0.1	0	N/A
hsa-miR-3942-3p	111-117	7mer-m8	-0.17	95	-0.17	0	N/A
hsa-miR-5100	111-117	7mer-1A	-0.1	86	-0.1	0	N/A
hsa-miR-892c-5p	112-118	7mer-m8	-0.15	91	-0.15	0	N/A
hsa-miR-586	116-123	8mer	-0.32	98	-0.32	0.01	N/A
hsa-miR-675-3p	119-126	8mer	-0.52	99	-0.52	0.064	N/A
hsa-miR-3149	120-126	7mer-m8	-0.09	86	-0.09	0.01	N/A
hsa-miR-297	120-126	7mer-1A	-0.14	82	-0.14	0.07	N/A
hsa-miR-643	121-127	7mer-m8	-0.15	85	-0.15	0.07	N/A
hsa-miR-4436a	130-136	7mer-1A	-0.16	91	-0.16	0.064	N/A
hsa-miR-5000-3p	130-136	7mer-1A	-0.21	91	-0.21	0.064	N/A
hsa-miR-3664-3p	131-137	7mer-m8	-0.16	91	-0.16	0	N/A
hsa-miR-197-3p	138-144	7mer-m8	-0.25	96	-0.25	0.07	N/A
hsa-miR-3926	145-152	8mer	-0.4	98	-0.4	0	N/A
hsa-miR-548s	146-152	7mer-m8	-0.2	94	-0.2	0	N/A
hsa-miR-3190-5p	147-153	7mer-m8	-0.3	98	-0.3	0	N/A
hsa-miR-193b-3p	148-154	7mer-m8	-0.38	96	-0.38	0.691	< 0.1
hsa-miR-193a-3p	148-154	7mer-m8	-0.38	96	-0.38	0.691	< 0.1
hsa-miR-6757-3p	150-156	7mer-m8	-0.23	96	-0.23	0	N/A
hsa-miR-200a-3p	151-157	7mer-m8	-0.19	92	-0.19	2.091	< 0.1
hsa-miR-141-3p	151-157	7mer-m8	-0.19	92	-0.19	2.091	< 0.1
hsa-miR-125b-2-3p	161-168	8mer	-0.45	99	-0.45	0	N/A
hsa-miR-513b-5p	162-168	7mer-m8	-0.2	96	-0.2	0.07	N/A
hsa-miR-4457	162-168	7mer-1A	-0.21	94	-0.21	0	N/A
hsa-miR-1911-5p	172-178	7mer-1A	-0.19	84	-0.19	0.064	N/A
hsa-miR-3622b-3p	176-182	7mer-m8	-0.23	97	-0.23	0	N/A
hsa-miR-3622a-3p	176-182	7mer-m8	-0.22	96	-0.22	0	N/A
hsa-miR-1228-3p	178-185	8mer	-0.36	98	-0.36	0	N/A
hsa-miR-342-3p	180-186	7mer-m8	-0.17	92	-0.17	0.241	N/A
hsa-miR-3909	184-190	7mer-1A	-0.23	89	-0.23	0	N/A
hsa-miR-6852-3p	184-190	7mer-1A	-0.2	85	-0.2	0	N/A
hsa-miR-676-3p	185-191	7mer-1A	-0.24	95	-0.24	0.01	N/A
hsa-miR-2355-3p	185-191	7mer-m8	-0.18	82	-0.18	0	N/A
hsa-miR-3655	187-193	7mer-1A	-0.16	95	-0.16	0	N/A
hsa-miR-578	188-194	7mer-m8	-0.09	84	-0.09	0.064	N/A
hsa-miR-33a-5p	193-199	7mer-1A	-0.1	89	-0.1	0.134	< 0.1
hsa-miR-33b-5p	193-199	7mer-1A	-0.1	89	-0.1	0.134	< 0.1
hsa-miR-3680-3p	194-200	7mer-m8	-0.17	94	-0.17	0	N/A
hsa-miR-6077	204-210	7mer-m8	-0.1	87	-0.1	0	N/A
hsa-miR-6830-5p	207-214	8mer	-0.24	96	-0.24	0	N/A
hsa-miR-561-5p	208-214	7mer-m8	-0.13	76	-0.13	0	N/A
hsa-miR-6794-3p	213-219	7mer-1A	-0.17	88	-0.17	0	N/A
hsa-miR-3606-3p	214-226	non-canonical	N/A	N/A	N/A	0	N/A
hsa-miR-3606-3p	214-226	non-canonical	N/A	N/A	N/A	0	N/A
hsa-miR-4305	231-237	7mer-1A	-0.22	85	-0.22	0	N/A
hsa-miR-517-5p	232-238	7mer-m8	-0.13	76	-0.13	0.01	N/A
hsa-miR-6502-5p	233-239	7mer-m8	-0.25	91	-0.25	0	N/A
hsa-miR-1301-5p	233-239	7mer-m8	-0.24	91	-0.24	0	N/A
hsa-miR-6822-3p	234-240	7mer-m8	-0.22	91	-0.22	0	N/A
hsa-miR-2467-5p	236-242	7mer-m8	-0.34	98	-0.34	0	N/A
hsa-miR-583	239-246	8mer	-0.28	98	-0.28	0.01	N/A
hsa-miR-1276	240-246	7mer-1A	-0.01	54	-0.01	0.01	N/A
hsa-miR-4311	240-246	7mer-1A	-0.01	41	-0.01	0	N/A
hsa-miR-4642	246-252	7mer-1A	-0.16	86	-0.16	0	N/A
hsa-miR-182-5p	247-253	7mer-1A	-0.22	88	-0.22	0.241	< 0.1
hsa-miR-1271-5p	247-253	7mer-1A	-0.14	80	-0.14	0.241	< 0.1
hsa-miR-96-5p	247-253	7mer-1A	-0.09	74	-0.09	0.241	< 0.1
hsa-miR-9-5p	249-255	7mer-1A	-0.13	88	-0.13	2.524	< 0.1
hsa-miR-6844	250-256	7mer-1A	-0.04	67	-0.04	0	N/A
hsa-miR-4734	257-263	7mer-1A	-0.28	91	-0.28	0	N/A
hsa-miR-3182	260-266	7mer-1A	-0.04	80	-0.04	0	N/A
hsa-miR-4659b-3p	261-268	8mer	-0.13	87	-0.13	0	N/A
hsa-miR-4659a-3p	261-268	8mer	-0.13	87	-0.13	0	N/A
hsa-miR-6875-3p	262-268	7mer-1A	-0.02	52	-0.02	0	N/A
hsa-miR-613	272-278	7mer-1A	-0.19	88	-0.19	1.207	< 0.1
hsa-miR-206	272-278	7mer-1A	-0.09	75	-0.09	1.207	< 0.1
hsa-miR-1-3p	272-278	7mer-1A	-0.09	75	-0.09	1.207	< 0.1
hsa-miR-4742-3p	289-295	7mer-m8	-0.14	86	-0.14	0	N/A
hsa-miR-548p	301-307	7mer-1A	-0.14	94	-0.14	0.01	N/A
hsa-miR-4766-3p	302-308	7mer-1A	-0.17	89	-0.17	0	N/A
hsa-miR-374b-3p	303-309	7mer-1A	-0.21	92	-0.21	0	N/A
hsa-miR-3691-3p	310-316	7mer-1A	-0.14	87	-0.14	0	N/A
hsa-miR-106b-3p	321-327	7mer-1A	-0.3	85	-0.3	0	N/A
hsa-miR-4712-3p	330-336	7mer-m8	-0.19	92	-0.19	0	N/A
hsa-miR-4770	333-339	7mer-m8	-0.2	92	-0.2	0.621	< 0.1
hsa-miR-6088	333-339	7mer-m8	-0.19	92	-0.19	0.621	< 0.1
hsa-miR-143-3p	333-339	7mer-m8	-0.18	91	-0.18	0.621	< 0.1
hsa-miR-4306	336-343	8mer	-0.43	99	-0.43	0.802	N/A
hsa-miR-185-5p	336-343	8mer	-0.45	99	-0.45	0.802	N/A
hsa-miR-4644	336-343	8mer	-0.47	99	-0.47	0.802	N/A
hsa-miR-5192	337-343	7mer-1A	-0.21	94	-0.21	0	N/A
hsa-miR-7847-3p	339-345	7mer-1A	-0.26	90	-0.26	0	N/A
hsa-miR-6833-5p	340-346	7mer-1A	-0.19	93	-0.19	0	N/A
hsa-miR-4752	340-346	7mer-1A	-0.16	87	-0.16	0	N/A
hsa-miR-382-5p	343-349	7mer-m8	-0.09	89	-0.09	0.207	N/A
hsa-miR-4670-3p	345-351	7mer-1A	-0.16	89	-0.16	0	N/A
hsa-miR-8060	347-353	7mer-m8	-0.24	97	-0.24	0	N/A
hsa-miR-5589-3p	350-356	7mer-m8	-0.27	95	-0.27	0	N/A
hsa-miR-15b-5p	354-360	7mer-m8	-0.27	93	-0.27	1.731	0.21
hsa-miR-497-5p	354-360	7mer-m8	-0.25	93	-0.25	1.731	0.21
hsa-miR-424-5p	354-360	7mer-m8	-0.25	92	-0.25	1.731	0.21
hsa-miR-15a-5p	354-360	7mer-m8	-0.26	92	-0.26	1.731	0.21
hsa-miR-6838-5p	354-360	7mer-m8	-0.26	92	-0.26	1.731	0.21
hsa-miR-16-5p	354-360	7mer-m8	-0.24	91	-0.24	1.731	0.21
hsa-miR-195-5p	354-360	7mer-m8	-0.24	91	-0.24	1.731	0.21
hsa-miR-922	356-362	7mer-1A	-0.14	94	-0.14	0.07	N/A
hsa-miR-4291	356-362	7mer-m8	-0.22	93	-0.22	0	N/A
hsa-miR-761	356-362	7mer-1A	-0.11	90	-0.11	0.612	N/A
hsa-miR-214-3p	356-362	7mer-1A	-0.15	88	-0.15	0.612	N/A
hsa-miR-3619-5p	356-362	7mer-1A	-0.13	86	-0.13	0.612	N/A
hsa-miR-4282	365-371	7mer-1A	-0.01	49	-0.01	0	N/A
hsa-miR-4716-5p	372-378	7mer-m8	-0.21	95	-0.21	0	N/A
hsa-miR-3187-3p	375-381	7mer-m8	-0.22	96	-0.22	0	N/A
hsa-miR-4529-5p	375-381	7mer-1A	-0.17	82	-0.17	0	N/A
hsa-miR-7108-5p	377-383	7mer-m8	-0.25	96	-0.25	0	N/A
hsa-miR-663b	377-383	7mer-1A	-0.17	87	-0.17	0.01	N/A
hsa-miR-3189-5p	386-392	7mer-1A	-0.25	95	-0.25	0	N/A
hsa-miR-5699-5p	386-392	7mer-1A	-0.18	87	-0.18	0	N/A
hsa-miR-4758-3p	386-392	7mer-1A	-0.11	77	-0.11	0	N/A
hsa-miR-4450	397-404	8mer	-0.6	99	-0.6	0	N/A
hsa-miR-6857-5p	398-405	8mer	-0.62	99	-0.62	0	N/A
hsa-miR-450a-2-3p	399-406	8mer	-0.64	99	-0.64	0.064	N/A
hsa-miR-2110	399-405	7mer-1A	-0.3	97	-0.3	0	N/A
hsa-miR-6763-5p	399-405	7mer-1A	-0.26	93	-0.26	0.064	N/A
hsa-miR-6810-5p	399-405	7mer-1A	-0.23	93	-0.23	0	N/A
hsa-miR-3150a-3p	399-405	7mer-1A	-0.23	91	-0.23	0.064	N/A
hsa-miR-5572	400-406	7mer-1A	-0.19	92	-0.19	0	N/A
hsa-miR-4260	400-406	7mer-1A	-0.23	91	-0.23	0	N/A
hsa-miR-138-1-3p	405-411	7mer-1A	-0.08	88	-0.08	0	N/A
hsa-miR-365b-5p	414-421	8mer	-0.62	99	-0.62	0	N/A
hsa-miR-365a-5p	414-421	8mer	-0.62	99	-0.62	0	N/A
hsa-miR-3199	415-421	7mer-1A	-0.27	92	-0.27	0	N/A
hsa-miR-8052	415-421	7mer-1A	-0.25	91	-0.25	0	N/A
hsa-miR-548g-3p	420-426	7mer-1A	-0.16	95	-0.16	0	N/A
hsa-miR-548av-3p	420-426	7mer-1A	-0.14	92	-0.14	0	N/A
hsa-miR-2053	424-430	7mer-1A	-0.05	91	-0.05	0	N/A
hsa-miR-6844	427-434	8mer	-0.39	99	-0.39	0	N/A
hsa-miR-181d-5p	432-438	7mer-1A	-0.26	96	-0.26	2.279	< 0.1
hsa-miR-4262	432-438	7mer-1A	-0.19	95	-0.19	2.279	< 0.1
hsa-miR-181b-5p	432-438	7mer-1A	-0.25	95	-0.25	2.279	< 0.1
hsa-miR-181a-5p	432-438	7mer-1A	-0.25	95	-0.25	2.279	< 0.1
hsa-miR-181c-5p	432-438	7mer-1A	-0.25	95	-0.25	2.279	< 0.1
hsa-miR-323a-3p	436-442	7mer-m8	-0.28	99	-0.28	0.134	N/A
hsa-miR-3143	438-445	8mer	-0.32	98	-0.32	0	N/A
hsa-miR-543	438-444	7mer-1A	-0.08	91	-0.08	0.134	N/A
hsa-miR-302c-5p	439-446	8mer	-0.31	99	-0.31	0	N/A
hsa-miR-552-5p	441-447	7mer-1A	-0.03	89	-0.03	0	N/A
hsa-miR-8062	446-452	7mer-m8	-0.33	98	-0.33	0	N/A
hsa-miR-186-5p	461-467	7mer-m8	-0.09	96	-0.09	2.725	N/A
hsa-miR-607	465-471	7mer-1A	-0.01	40	-0.01	0	N/A
hsa-miR-29b-2-5p	468-475	8mer	-0.5	99	-0.5	0	N/A
hsa-miR-659-3p	470-476	7mer-1A	-0.13	89	-0.13	0	N/A
hsa-miR-5002-5p	471-477	7mer-m8	-0.18	94	-0.18	0	N/A
hsa-miR-541-5p	475-481	7mer-m8	-0.24	96	-0.24	0.064	N/A
hsa-miR-607	480-486	7mer-1A	-0.01	40	-0.01	0	N/A
hsa-miR-8061	485-491	7mer-m8	-0.22	95	-0.22	0	N/A
hsa-miR-4760-5p	485-491	7mer-m8	-0.19	94	-0.19	0	N/A
hsa-miR-376a-5p	485-491	7mer-1A	-0.06	84	-0.06	0.064	N/A
hsa-miR-6840-3p	493-500	8mer	-0.44	99	-0.44	0	N/A
hsa-miR-4726-3p	494-500	7mer-1A	-0.18	94	-0.18	0	N/A
hsa-miR-6764-5p	494-500	7mer-1A	-0.19	94	-0.19	0	N/A
hsa-miR-1915-3p	494-500	7mer-1A	-0.17	93	-0.17	0	N/A
hsa-miR-5588-3p	496-502	7mer-m8	-0.26	94	-0.26	0	N/A
hsa-miR-548d-3p	507-514	8mer	-0.32	99	-0.32	0.064	N/A
hsa-miR-548ac	507-514	8mer	-0.31	99	-0.31	0.064	N/A
hsa-miR-548bb-3p	507-514	8mer	-0.32	99	-0.32	0.064	N/A
hsa-miR-548z	507-514	8mer	-0.3	99	-0.3	0.064	N/A
hsa-miR-548h-3p	507-514	8mer	-0.3	99	-0.3	0.064	N/A
hsa-miR-548am-3p	508-514	7mer-1A	-0.05	92	-0.05	0.064	N/A
hsa-miR-548ah-3p	508-514	7mer-1A	-0.05	92	-0.05	0.064	N/A
hsa-miR-548j-3p	508-514	7mer-1A	-0.02	83	-0.02	0.064	N/A
hsa-miR-548aq-3p	508-514	7mer-1A	-0.02	83	-0.02	0.064	N/A
hsa-miR-548ae-3p	508-514	7mer-1A	-0.02	83	-0.02	0.064	N/A
hsa-miR-548x-3p	508-514	7mer-1A	-0.01	49	-0.01	0.064	N/A
hsa-miR-548aj-3p	508-514	7mer-1A	-0.01	49	-0.01	0.064	N/A
hsa-miR-3163	510-516	7mer-1A	-0.01	45	-0.01	0	N/A
hsa-miR-567	520-526	7mer-m8	-0.26	95	-0.26	0.01	N/A
hsa-miR-3185	531-537	7mer-1A	-0.26	97	-0.26	0	N/A
hsa-miR-4709-3p	532-538	7mer-1A	-0.23	96	-0.23	0	N/A
hsa-miR-944	537-543	7mer-m8	-0.08	94	-0.08	0	N/A
hsa-miR-6516-5p	548-555	8mer	-0.52	99	-0.52	0	N/A
hsa-miR-455-3p.2	548-554	7mer-1A	-0.15	92	-0.15	0.029	< 0.1
hsa-miR-5582-3p	554-561	8mer	-0.24	99	-0.24	0.408	N/A
hsa-miR-548ar-3p	555-561	7mer-1A	-0.13	96	-0.13	0.413	N/A
hsa-miR-548a-3p	555-561	7mer-1A	-0.11	95	-0.11	0.413	N/A
hsa-miR-548f-3p	555-561	7mer-1A	-0.11	94	-0.11	0.413	N/A
hsa-miR-548e-3p	555-561	7mer-1A	-0.09	93	-0.09	0.413	N/A
hsa-miR-548az-3p	555-561	7mer-1A	-0.09	93	-0.09	0.413	N/A
hsa-miR-4477a	559-565	7mer-1A	-0.18	97	-0.18	0	N/A
hsa-miR-548m	571-578	8mer	-0.54	99	-0.54	0	N/A
